# Supplementary material
Source: PubMed Central journal article supplement (PMC7229667)
Supplement: pnas.1922622117.sapp.pdf [file pnas.1922622117.sapp.pdf]

## Supplemental Information for

# Pan-cancer analysis identifies mutations in *SUGP1* that recapitulate mutant SF3B1 splicing dysregulation

Zhaoqi Liu<sup>a,b,c,1</sup>, Jian Zhang<sup>d,1</sup>, Yiwei Sun<sup>a,c</sup>, Tomin E. Perea-Chamblee<sup>a,b,c</sup>, James L. Manley<sup>d,2</sup>, Raul Rabadan<sup>a,b,c,2</sup>

<sup>a</sup>Program for Mathematical Genomics

<sup>b</sup>Department of Systems Biology

<sup>c</sup>Department of Biomedical Informatics, Columbia University, New York, NY 10032

<sup>d</sup>Department of Biological Sciences, Columbia University, New York, NY 10027

<sup>1</sup>Z.L. and J.Z. contributed equally to this work.

<sup>2</sup>To whom correspondence may be addressed.

**Email:** [jlm2@columbia.edu](mailto:jlm2@columbia.edu) or [rr2579@cumc.columbia.edu](mailto:rr2579@cumc.columbia.edu)

This PDF file includes:

Figures S1 to S5 and Legends

## Supplemental Figures

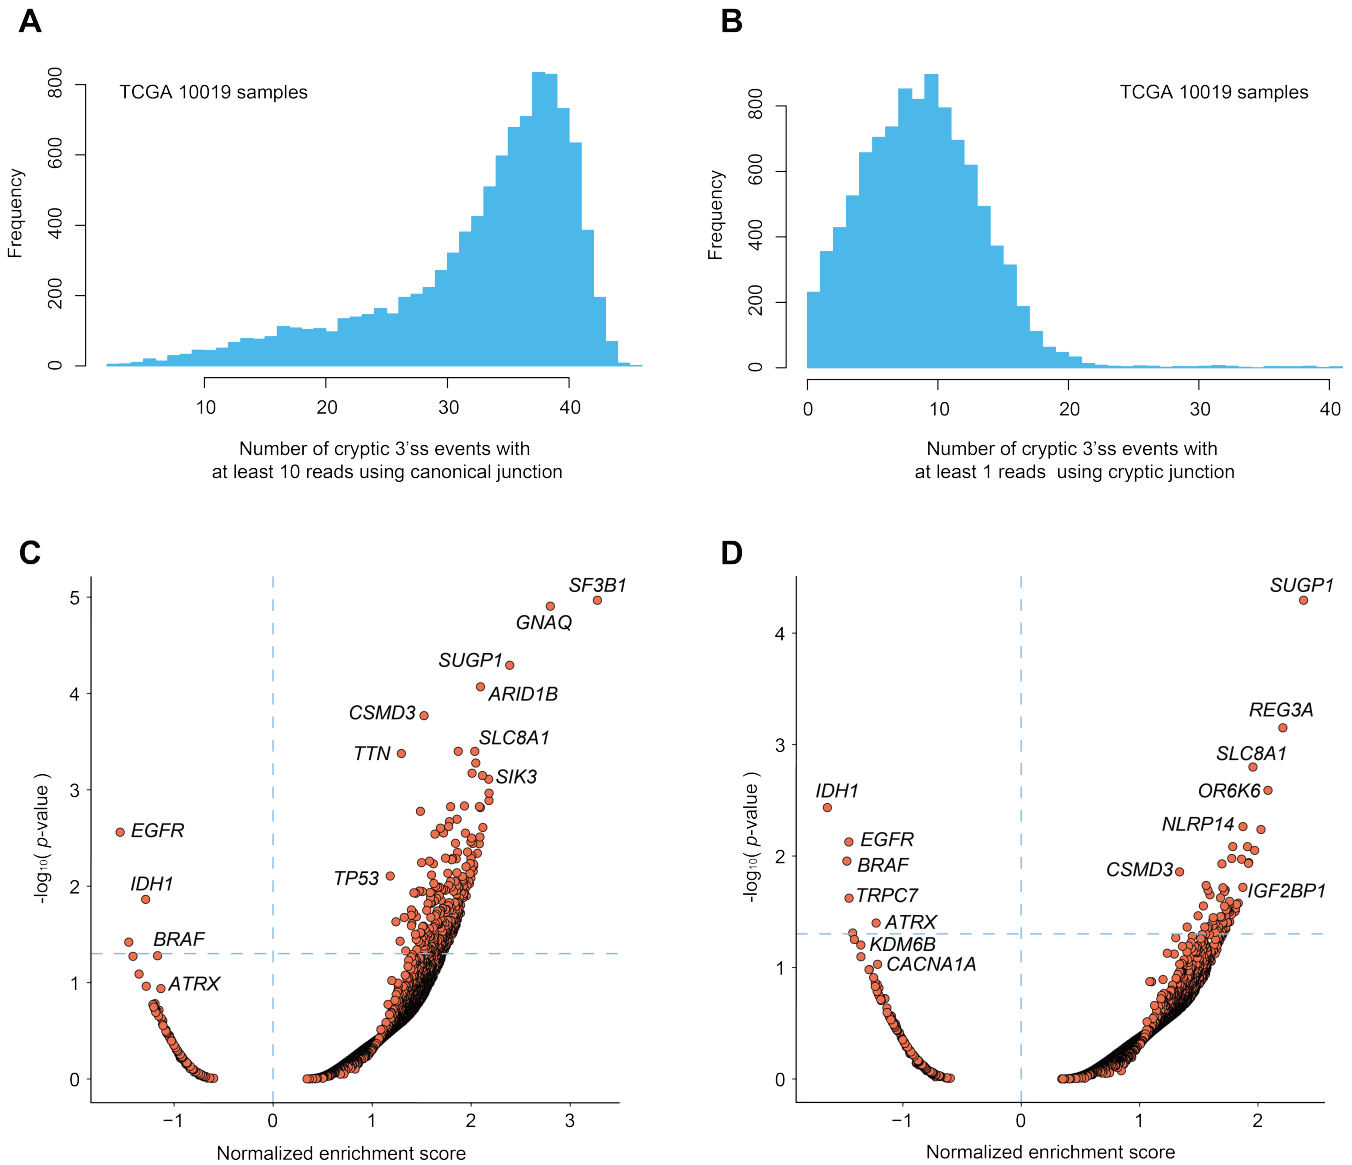

**Fig. S1.** Identification of alternative 3'ss splicing associated genetic variants. (A, B) Distributions of expression level of the 47 cryptic 3'ss events in 10019 TCGA samples. X-axis denotes the number of cryptic 3'ss events with at least 10 reads using canonical junction (A), and the number of cryptic 3'ss events with at least 1 read using cryptic junction (B). The Y-axis denotes the frequency (number of TCGA samples). (C, D) Volcano plot representations of genes correlated with cryptic 3'ss usage. The normalized enrichment score (horizontal axis) and  $-\log_{10}$  p-value (vertical axis) are derived from pre-ranked enrichment test. Analysis were performed on all TCGA samples (C) and SF3B1 non-mutated samples (D).

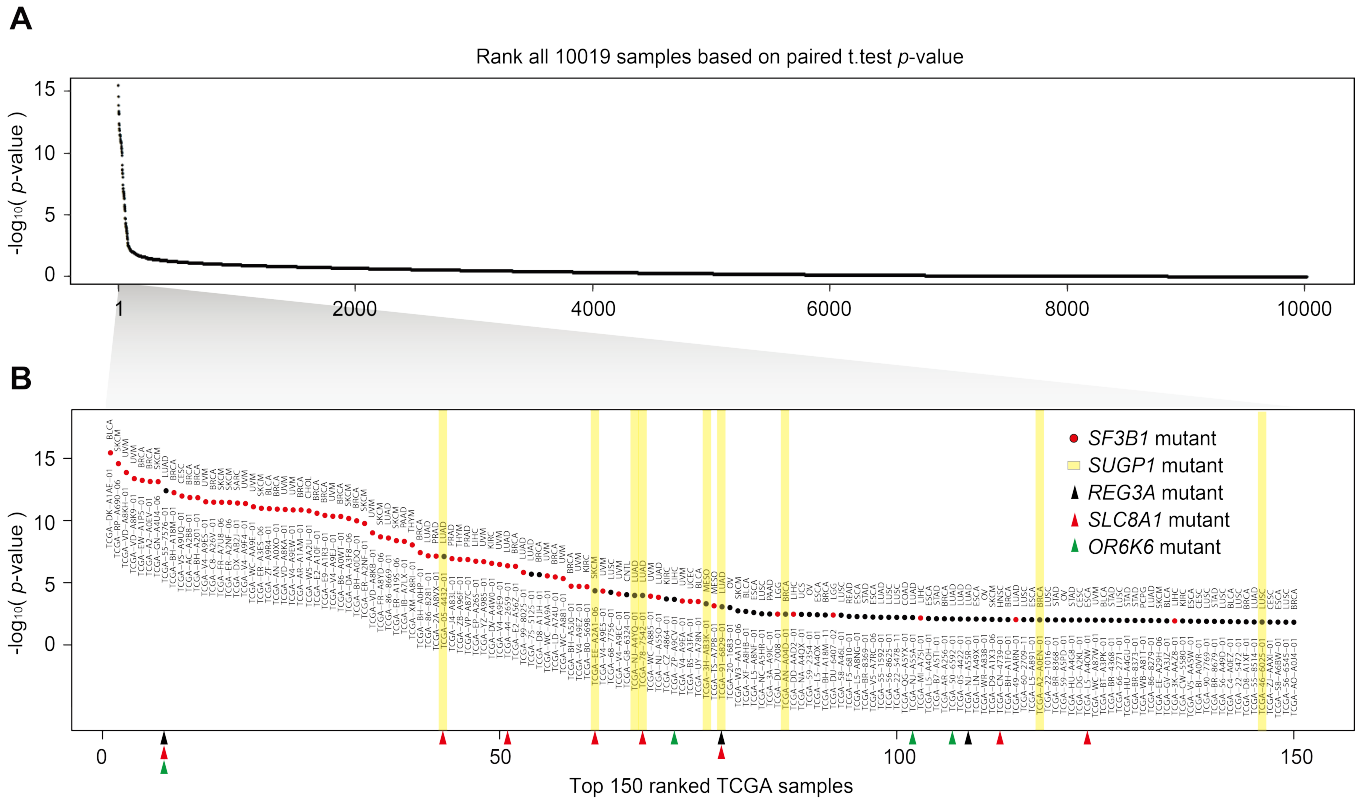

**Fig. S2.** Identification of genetic variants associated with cryptic 3'ss usage. (A) Ranking of all TCGA samples based on paired t.test  $p$ -value, which indicated the extent of cryptic 3'ss usage. (B) Top 150 ranked TCGA samples from (A). *SF3B1* mutants are indicated as red dots, *SUGP1* mutants are colored as yellow bars. *REG3A*, *SLC8A1* and *OR6K6* mutants were also shown with arrow of different color.

**A**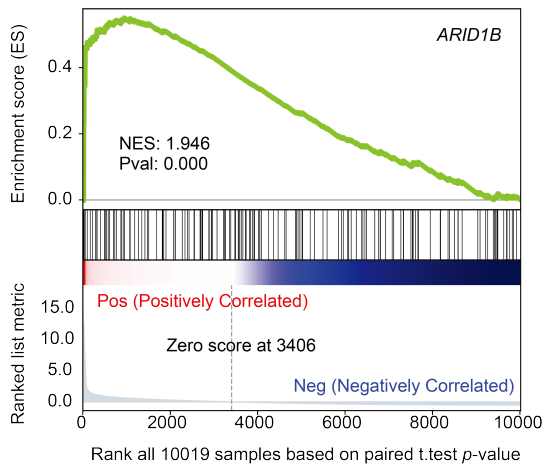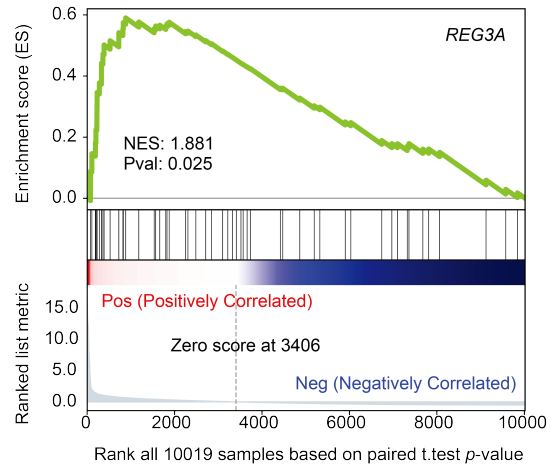**B**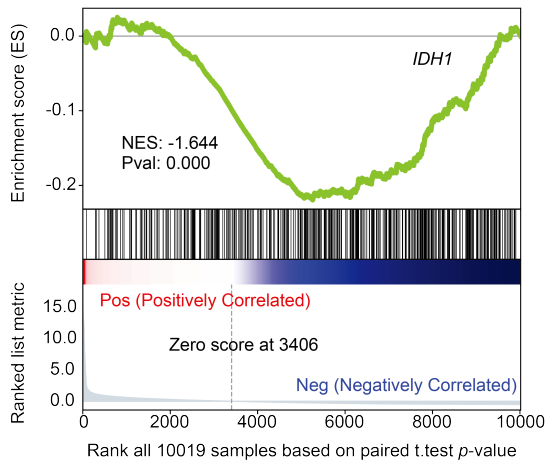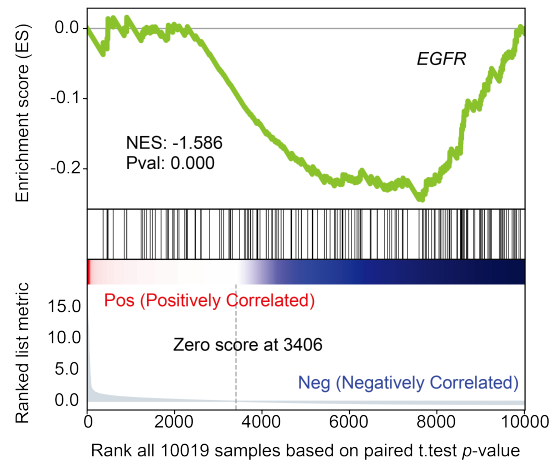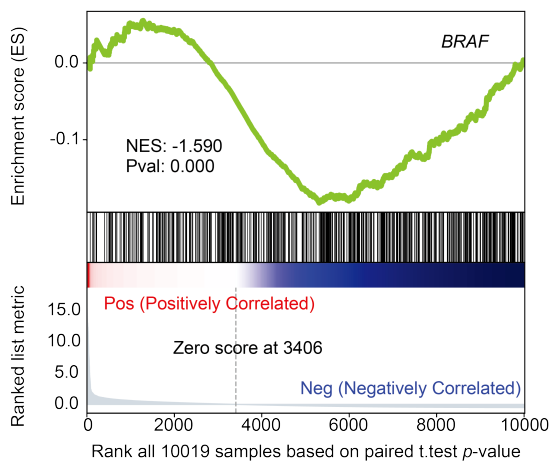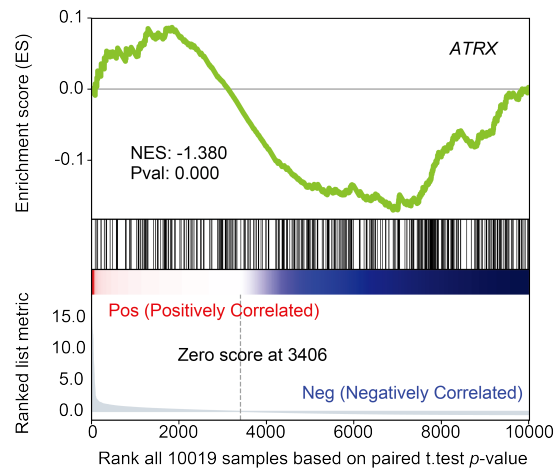

**Fig. S3.** Pre-ranked enrichment analysis showing top gene mutations that are positively (A) or negatively (B) associated with alternative 3'ss usage.



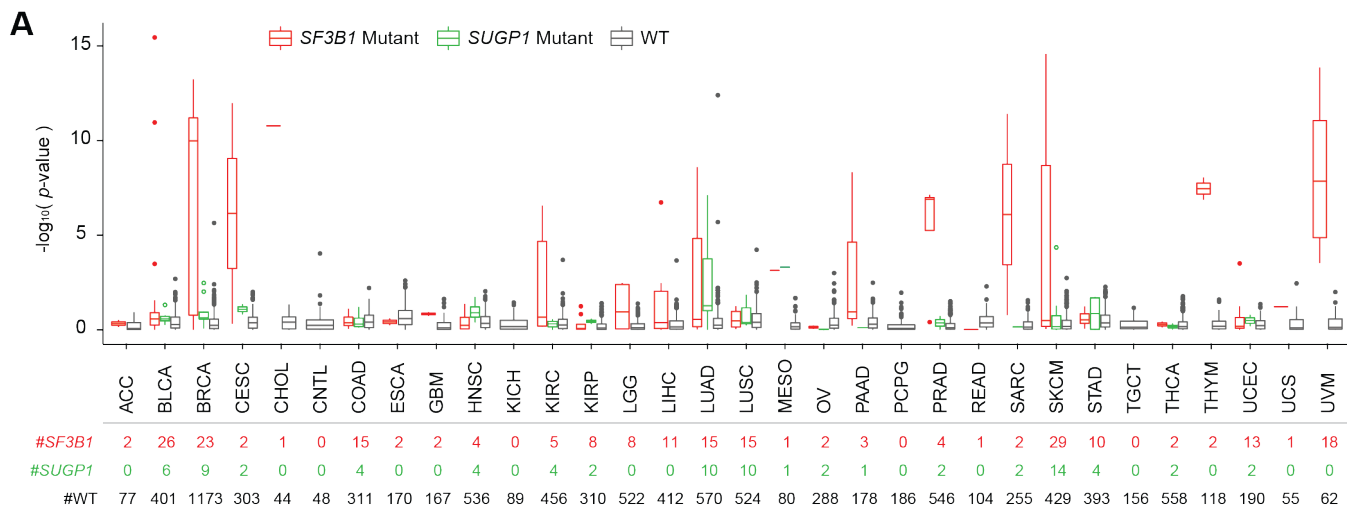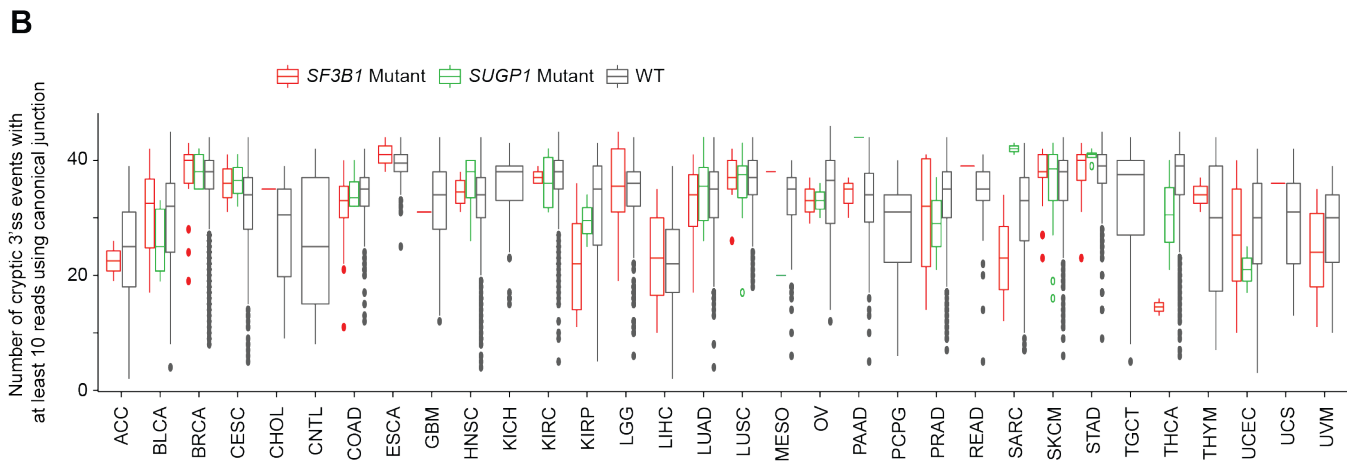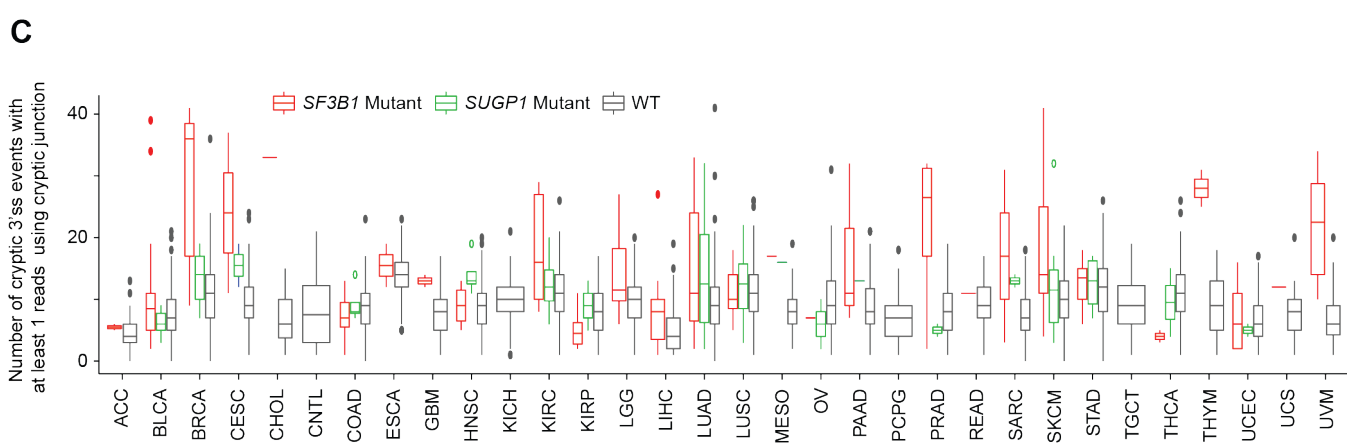

**Fig. S5.** (A) Boxplots show distribution of cryptic 3'ss associations on each TCGA cancer type. *SF3B1* and *SUGP1* mutants were plotted separately. Numbers in the table below indicates the number of mutant samples present in each cancer type. (B-C) Boxplots show distributions of expression level of the 47 cryptic 3'ss events on each TCGA cancer types. *SF3B1* and *SUGP1* mutants were plotted separately. Y-axis denotes the number of cryptic 3'ss events with at least 10 reads using canonical junction in (B), and the number of cryptic 3'ss events with at least 1 reads using cryptic junction in (C).
